# Supplementary material for: Fluorometric and colorimetric analysis of alkaline phosphatase activity based on a nucleotide coordinated copper ion mimicking polyphenol oxidase
Source: Royal Society of Chemistry journal article supplement (doi:10.1039/c9tb01390c), 2019-01-01
Supplement: c9tb01390c1.pdf [file c9tb01390c1.pdf]

## Supplementary Material

### Fluorometric and colorimetric analysis of alkaline phosphatase activity based on nucleotide coordinated copper ion as mimicking polyphenol oxidase

Hui Huang<sup>a\*</sup>, Juan Bai<sup>a</sup>, Jiao Li<sup>a</sup>, Lulu Lei<sup>a</sup>, Wenjing Zhang<sup>a</sup>, Shujun Yan<sup>a</sup>, Yongxin Li<sup>b\*</sup>

<sup>a</sup>College of Food Science and Engineering, Jilin University, Changchun 130025, China.

<sup>b</sup>College of New Energy and Environment, Jilin University, Changchun 130012, China

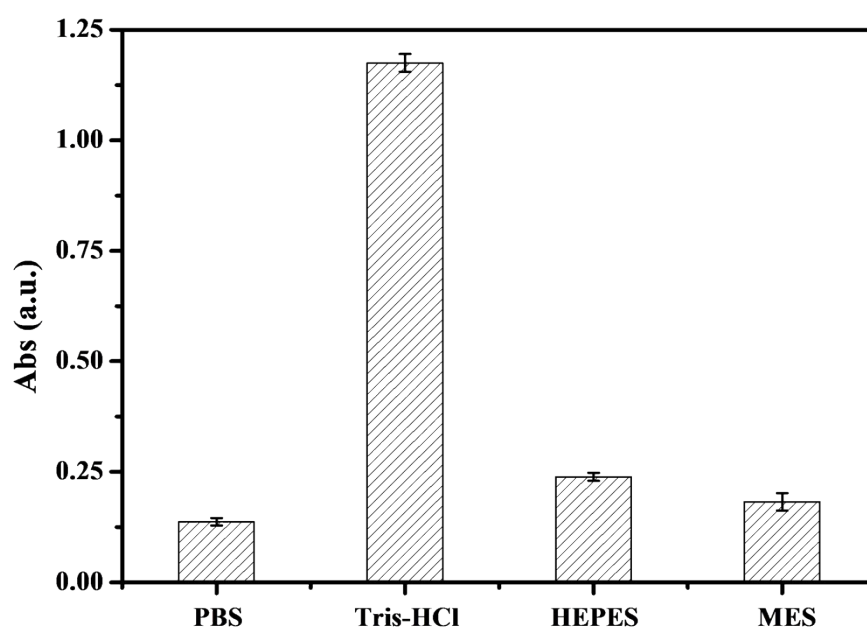

**Figure S1** Comparison of catalytic activities of nanozymes synthesized in four kinds of buffer solutions. All the buffers are 10 mM, pH=8.5.

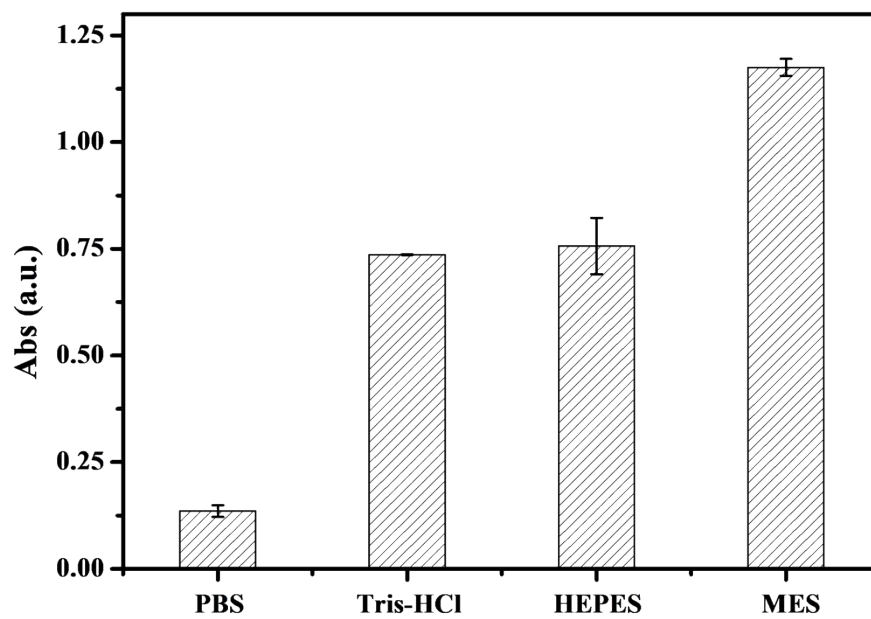

**Figure S2** Comparison of catalytic activities of nanozymes in four buffers in the chromogenic reaction. All the buffers are 30 mM (pH=6.7).

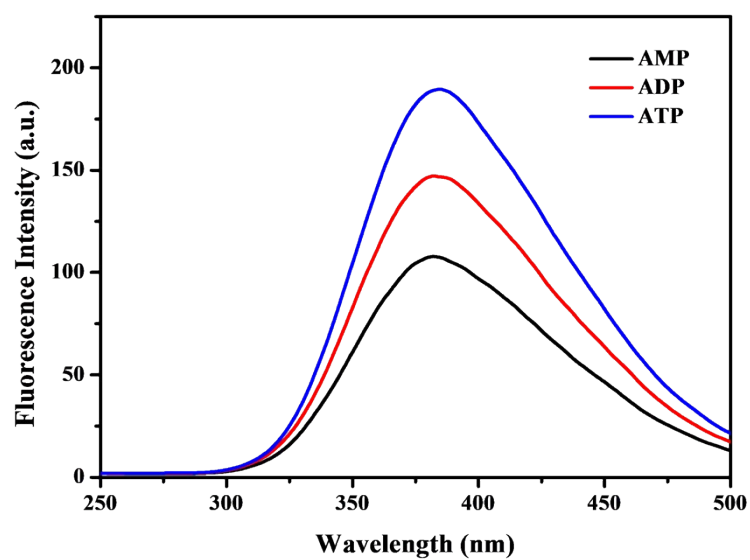

**Figure S3** The fluorescence spectra of nucleotides. The concentrations of ATP, ADP and AMP are 10 mM in 60 mM MES buffer (pH = 6.7). Ex = 220 nm.

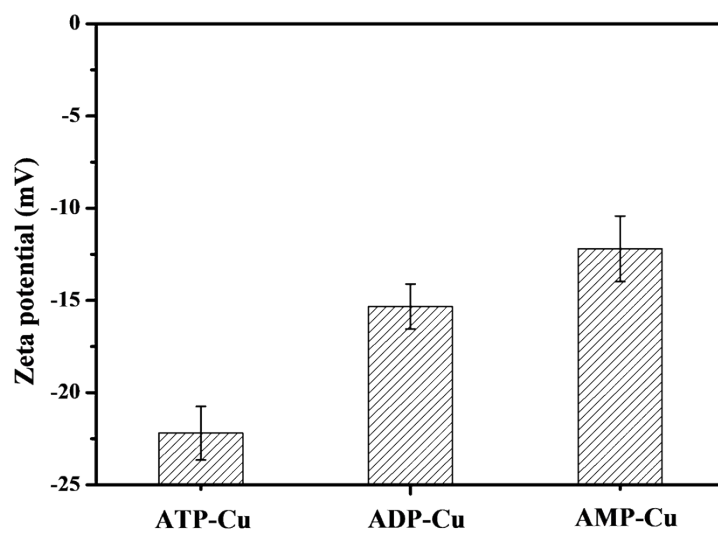

**Figure S4** The zeta potential of prepared nanozymes.

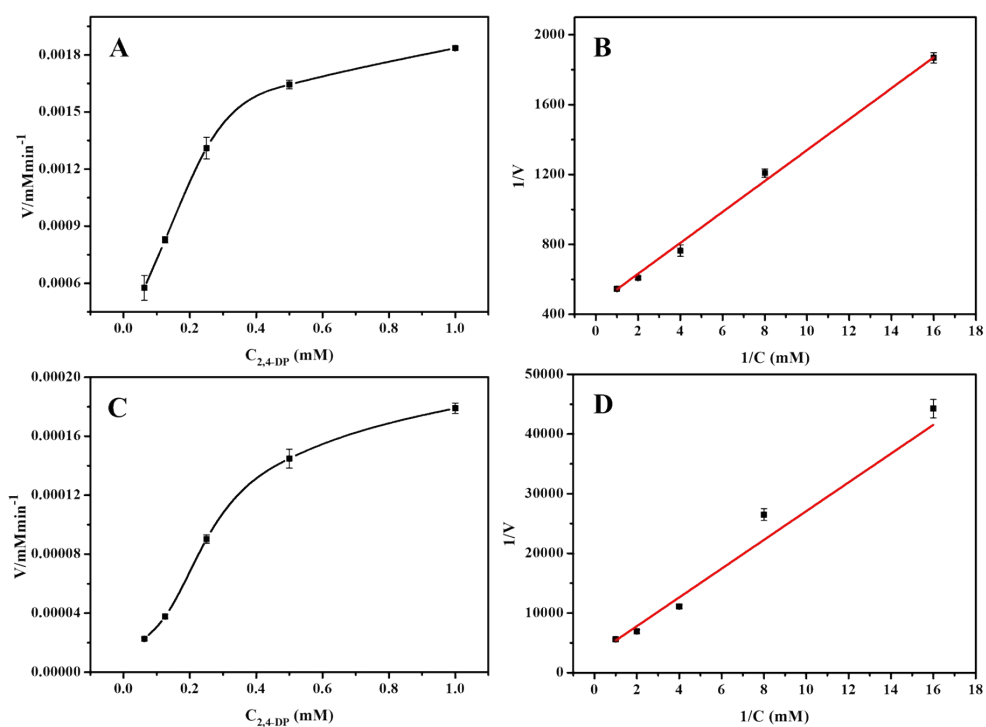

**Figure S5** Steady-state kinetic assay of ATP-Cu (A and B) and laccase (C and D). The concentration of 2,4-DP was 0.0625, 0.125, 0.25, 0.5, 1 mM. The error bars represent the standard deviation of three measurements.

**Table S1** The kinetic parameters of ATP-Cu and laccase

| Catalysts | $V_{max}$ (mM/min) | $K_m$ (mM) |
|-----------|--------------------|------------|
| ATP-Cu    | 0.0022             | 0.207      |
| Laccase   | 0.0003             | 0.891      |

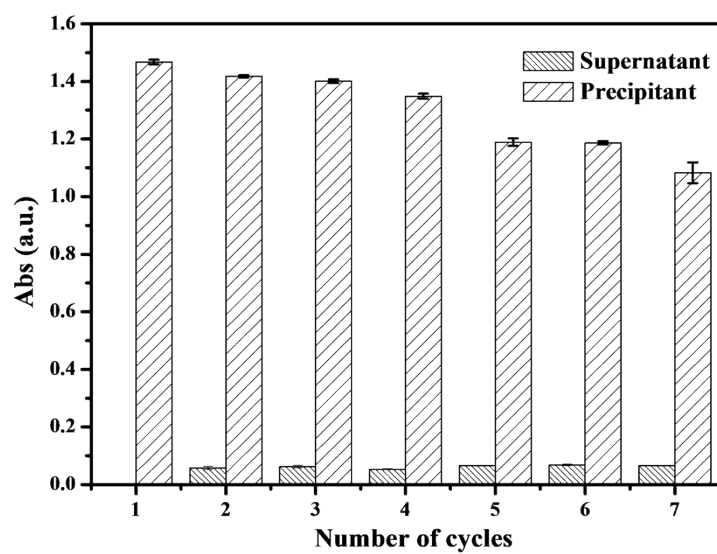

**Figure S6** The catalytic activity of the supernatant and precipitation of the nanozymes cycled for 7 times, respectively.

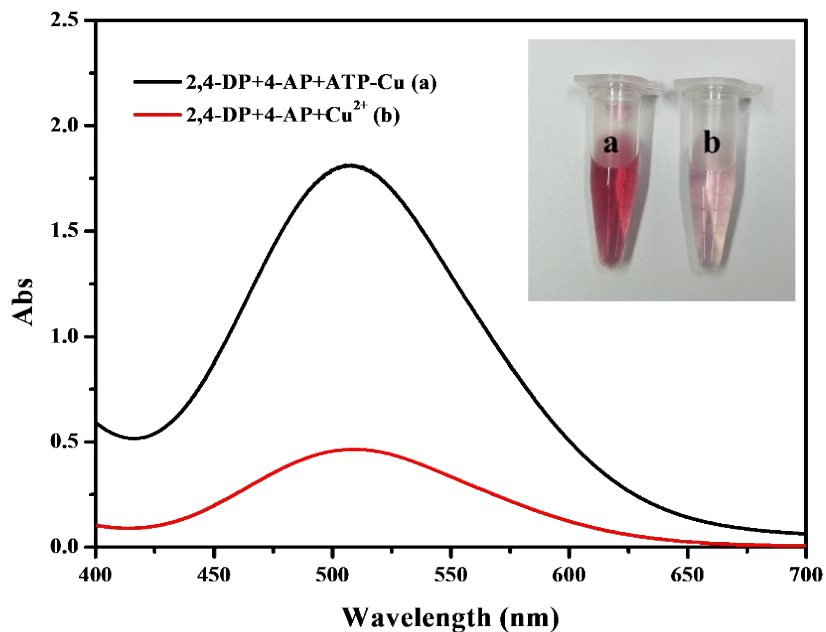

**Figure S7** Control experiment comparing single  $\text{Cu}^{2+}$  and ATP-Cu for PPO-like activity.

**Table S2** Comparison of different methods for the determination of ALP.

| System                                                       | Linear range (U/L) | Detection limit (U/L) | Ref. |
|--------------------------------------------------------------|--------------------|-----------------------|------|
| Near infrared $\text{Ag}_2\text{S}$ quantum dots and calcein | 2-100              | 1.28                  | S1   |
| Facile colorimetric assay                                    | 60-100             | 5.4                   | S2   |
| Gold nanoparticles-based colorimetric assay                  | 100-600            | 10                    | S3   |
| High-Resolution Colorimetric Assay                           | 5-100              | 3.3                   | S4   |
| Real-time Ratiometric Fluorescent Assay                      | 25-200             | 10                    | S5   |
| This work                                                    | 1-30               | 0.3                   | -    |

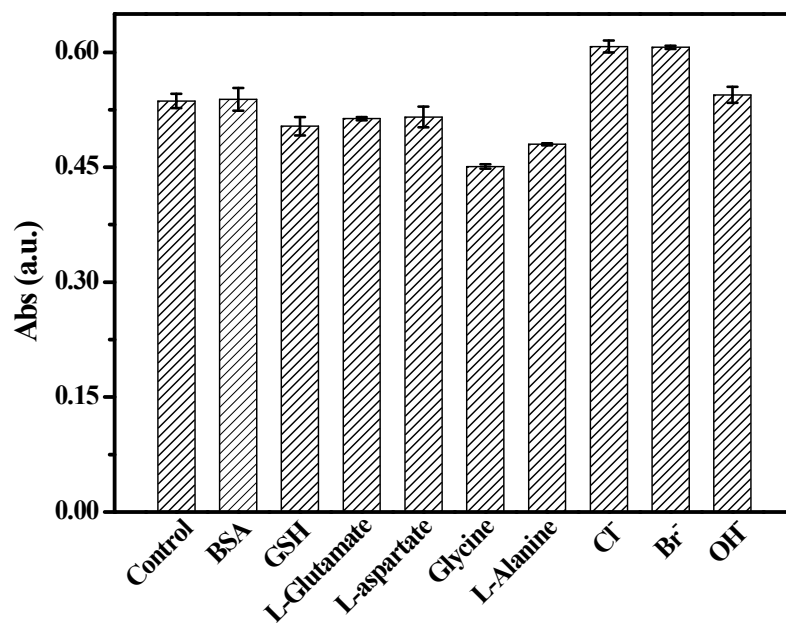

**Figure S8** The selectivity of the GTP-based method for ALP assay. Absorbance intensity at 510 nm for reaction solutions containing BSA (10  $\mu$ M), GSH (3 mM), L-Glutamate (100  $\mu$ g/mL), L-aspartic acid (100  $\mu$ g/mL), Glycine (100  $\mu$ g/mL), L-alanine (100  $\mu$ g/mL), Cl<sup>-</sup> (3 mM), Br<sup>-</sup> (3 mM), and OH<sup>-</sup> (3 mM) respectively in the presence of 30 U/L of ALP.



### Supplementary References

- S1. M. Cai, C. Ding, F. Wang, M. Ye, C. Zhang and Y. Xian, *Biosens. Bioelectron.*, 2019, **137**, 148-153.
- S2. D.-E. Wang, X. Gao, G. Li, T. Xue, H. Yang and H. Xu, *Sens. Actuators B-Chem.*, 2019, **289**, 85-92.
- S3. C. M. Li, S. J. Zhen, J. Wang, Y. F. Li and C. Z. Huang, *Biosens. Bioelectron.*, 2013, **43**, 366-371.
- S4. Z. Gao, K. Deng, X.-D. Wang, M. Miro and D. Tang, *ACS Appl. Mater. Interfaces*, 2014, **6**, 18243-18250.
- S5. J. Deng, P. Yu, Y. Wang and L. Mao, *Anal. Chem.*, 2015, **87**, 3080-3086.
